# Supplementary material for: Telluriding monolayer MoS2 and WS2 via alkali metal scooter
Source: PubMed Central journal article supplement (PMC5735184; doi:10.1038/s41467-017-02238-0), 2017-12-18
Supplement: 41467_2017_2238_MOESM1_ESM.pdf [file 41467_2017_2238_MOESM1_ESM.pdf]

## Supplementary Figures

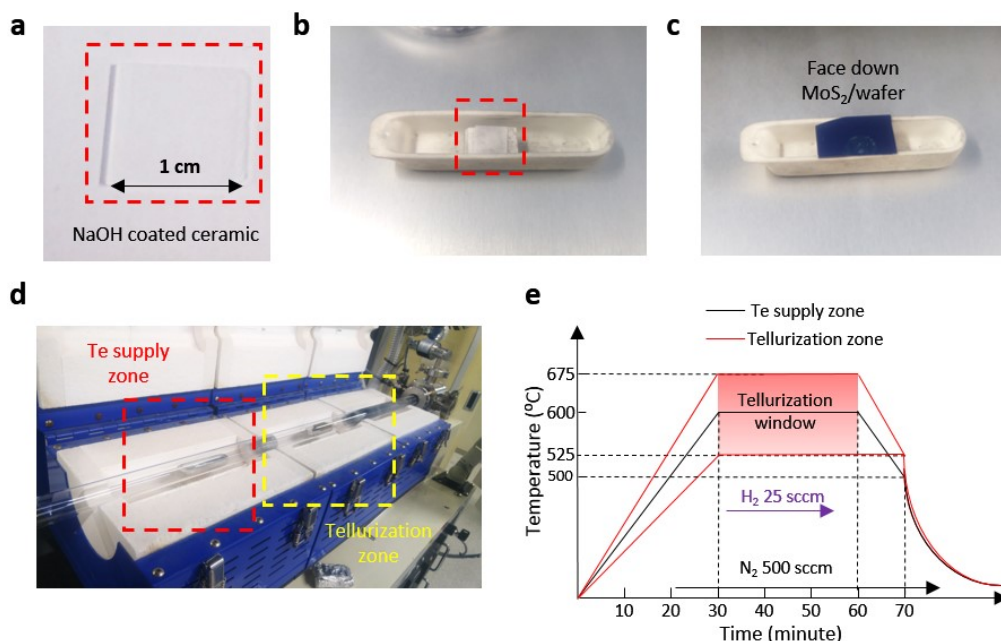

**Supplementary Figure 1 | Experimental setup and temperature profile of tellurization process.** **a**, Sodium hydroxide (0.1 g) was dissolved in 60 mL of deionized water. Of this NaOH solution, 25-100  $\mu\text{L}$  was dropped onto a sapphire substrate and dried in an oven. **b,c**, The NaOH-coated substrate placed in a ceramic crucible ( $L 1.5 \times W 5 \times H 1.5 \text{ cm}^3$ ). The distance between the MoS<sub>2</sub> and NaOH-coated substrate can vary the feeding rate of the sodium metal, which is one of the key factors for the tellurization process. In this experiment, the distance was fixed at 2 mm by placing the NaOH substrate 1 cm above the supporter, in which the MoS<sub>2</sub> surface faced the NaOH substrate directly. This is also related to NaOH content. **d**, 1-inch two-zone CVD was introduced for controlling the temperature of the tellurium and conversion zones independently. **e**, The temperature profile of the tellurization process. The tellurization process was conducted at atmospheric pressure with a flow rate of 500 sccm for N<sub>2</sub> and 25 sccm for H<sub>2</sub> gas. It should be noted that H<sub>2</sub> gas was introduced to suppress oxidation by oxygen leakage and enhance the detachment of sulfur efficiently by hydrodesulfurization. Both zones are slowly cooled down without opening the furnace to minimize the strain between host materials and substrate.

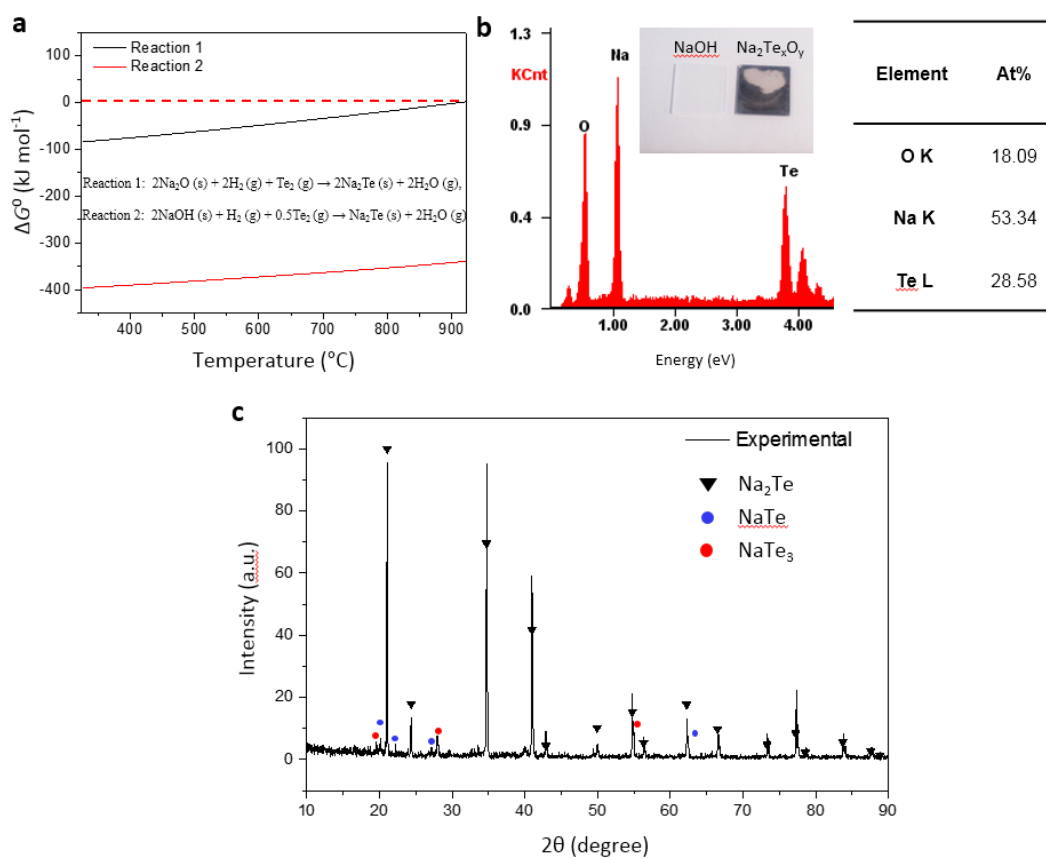

**Supplementary Figure 2 | Telluriding NaOH for formation of sodium scooter ( $\text{Na}_2\text{Te}$ ).** **a**, Gibbs free energy calculation for the reactions of telluriding NaOH. **b**, Energy dispersive spectroscopy spectra of tellurized NaOH sample which reveals the ratio of around 2 to 1 between Na and Te atom. **c**, XRD spectrum of tellurized NaOH sample.

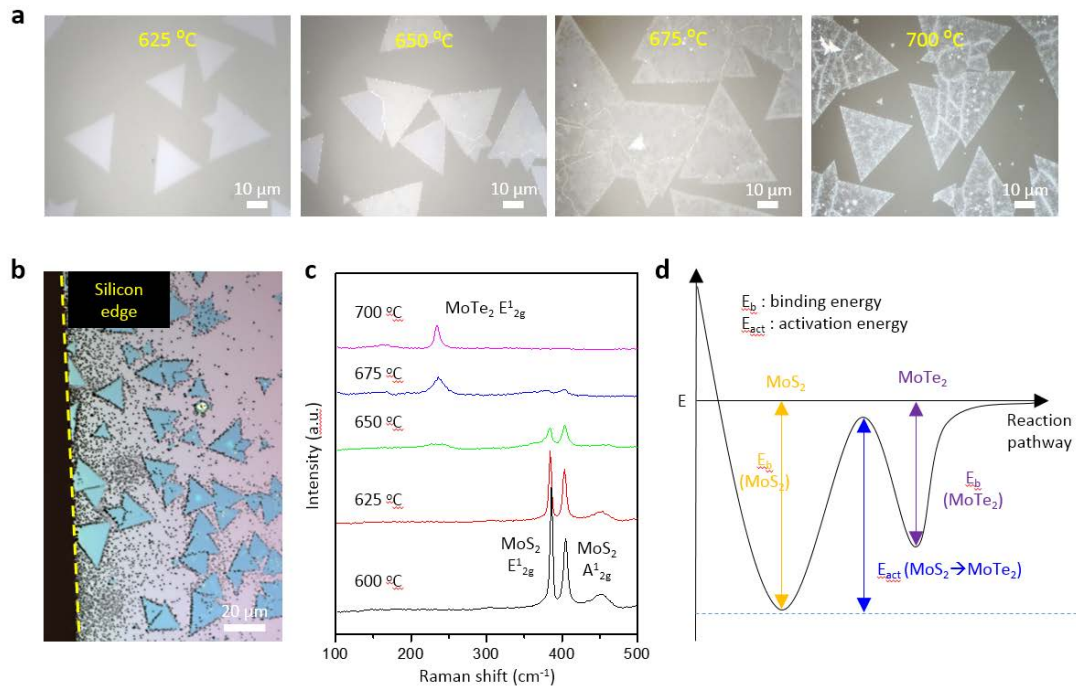

**Supplementary Figure 3 | Tellurization of MoS<sub>2</sub> flakes without Na-scooter.** **a**, Optical images of MoS<sub>2</sub> flakes which were tellurized at 625 °C, 650 °C, 675 °C, and 700 °C for 2h without a Na scooter. The triangular shape of the flakes was etched at temperatures over 650 °C. It should be noted that silicon telluride can be formed and deposited on MoS<sub>2</sub> flakes (Supplementary Figure 3b) which could lead to hindering the conversion of MoS<sub>2</sub> to MoTe<sub>2</sub> when a SiO<sub>2</sub>/Si wafer is used as a substrate. To avoid this, we used a sapphire substrate especially for the high-temperature tellurization process (over 650 °C). **c**, The corresponding Raman spectra of the tellurized MoS<sub>2</sub> samples. Even though the E<sub>1</sub><sup>2g</sup> mode for 2H-MoTe<sub>2</sub> appeared over 650 °C, the structure was broken at this temperature. **d**, Reaction pathway for the conversion from Mo–S to Mo–Te. The activation barrier height for converting MoS<sub>2</sub> to MoTe<sub>2</sub> is higher than the Mo–Te binding energy.

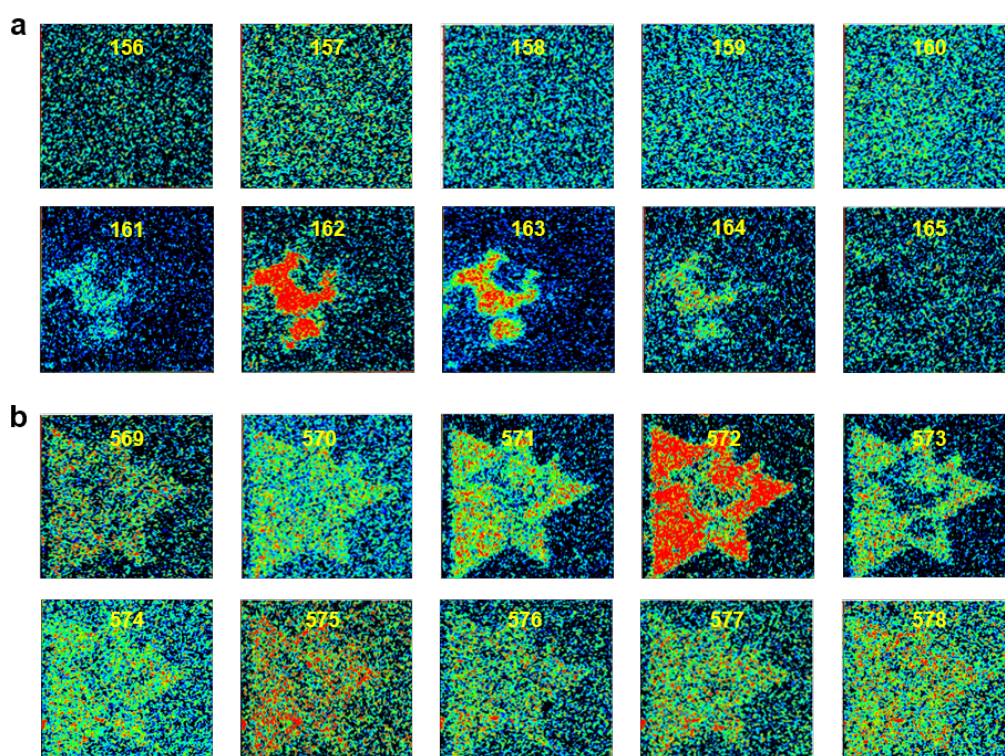

**Supplementary Figure 4 | X-ray photoelectron spectroscopy (XPS) mapping images of 15-min tellurized  $\text{MoS}_x\text{Te}_{2-x}$  at different binding energies. a,** XPS mapping images extracted from 156 eV to 165 eV for detecting the S 2p<sub>3/2</sub> (162 eV) peak. **b,** XPS mapping images extracted from 569 eV to 578 eV for detecting the Te 3d<sub>5/2</sub> (572 eV) peak.

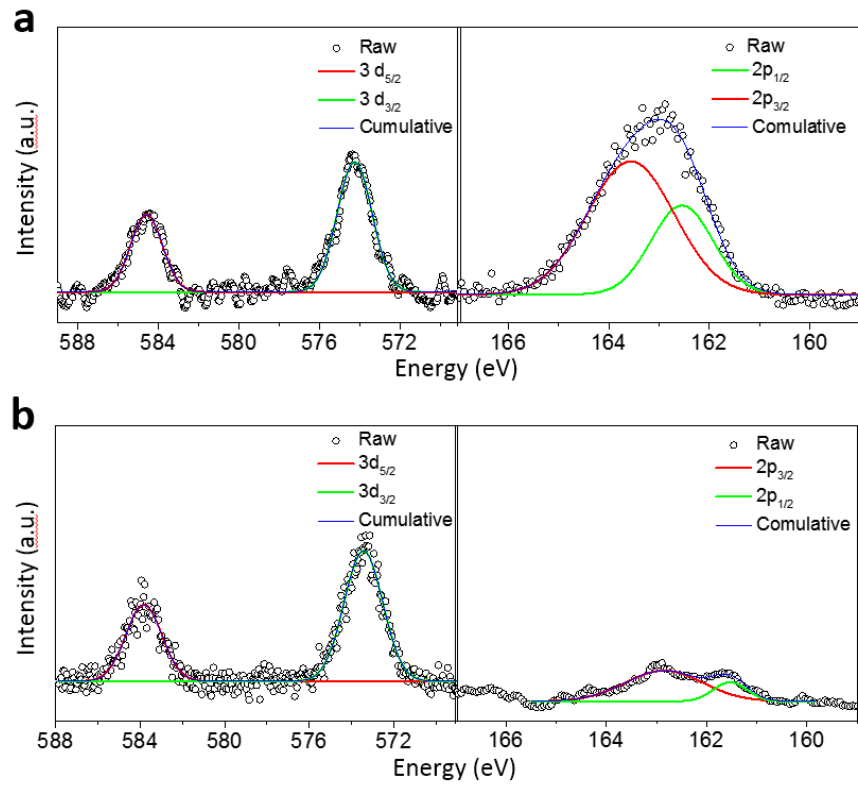

**Supplementary Figure 5 | Representative XPS spectra in MoS<sub>2</sub> sample tellurized for 15 min. a,** Representative XPS spectra in bright (inner) region. **b,** Representative XPS spectrum in dark (outer) region. The calculated S-to-Te ratios are 0.4 to 1.6 (inner region) and 0 to 2.0 (outer region), respectively. The red-shifted peaks for S 2p<sub>3/2</sub> compared with the inner and outer regions indicate that tellurium alloying gives a p-doping effect to MoS<sub>2</sub> due to its shifting of the Fermi level.

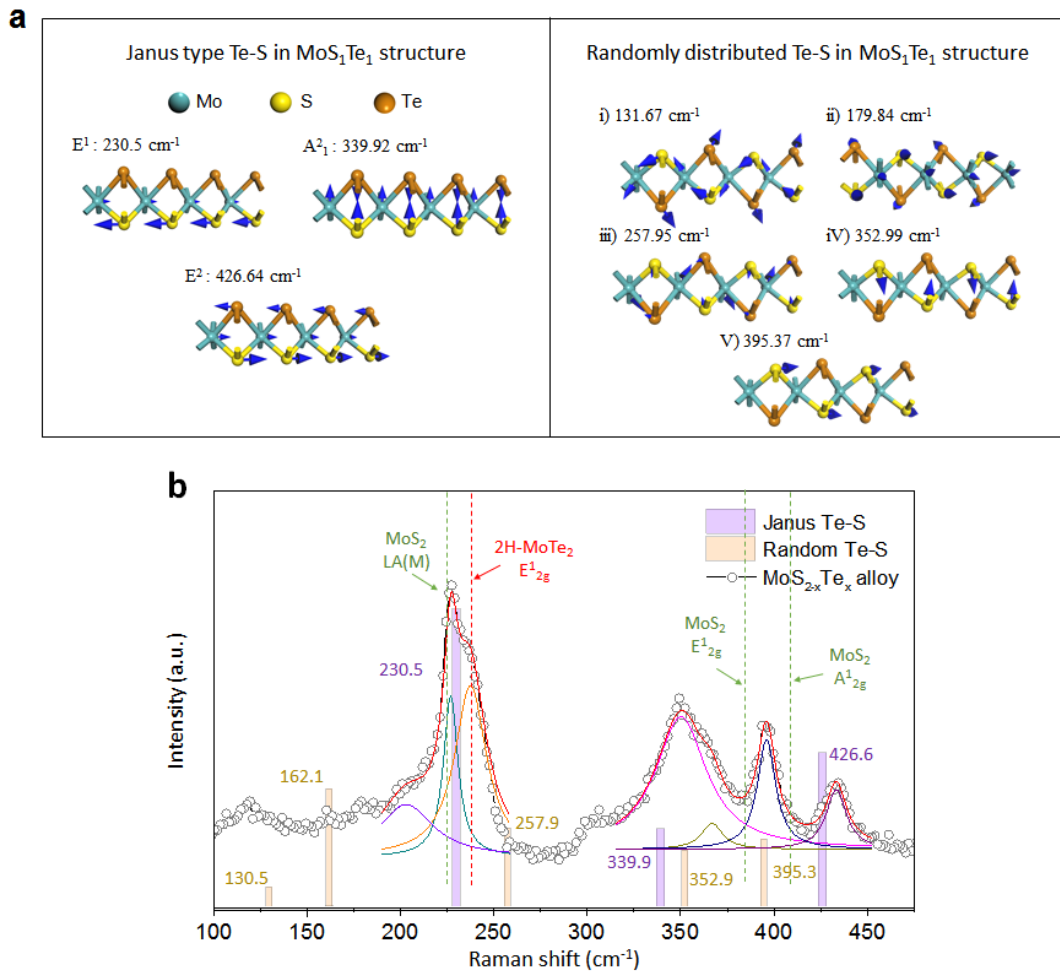

**Supplementary Figure 6 | Calculated phonon modes for the Janus-phase and random Te-S distributed  $\text{MoS}_1\text{Te}_1$  structure.** **a**, Schematic for various phonon vibration modes of the Janus-phase and random Te-S distributed  $\text{MoS}_1\text{Te}_1$  structure. **b**, The comparison between deconvoluted Raman spectrum of  $\text{MoS}_{2-x}\text{Te}_x$  alloy and calculated Raman modes of Janus and Random Te-S distributed  $\text{MoS}_1\text{Te}_1$  by the local density approximation.

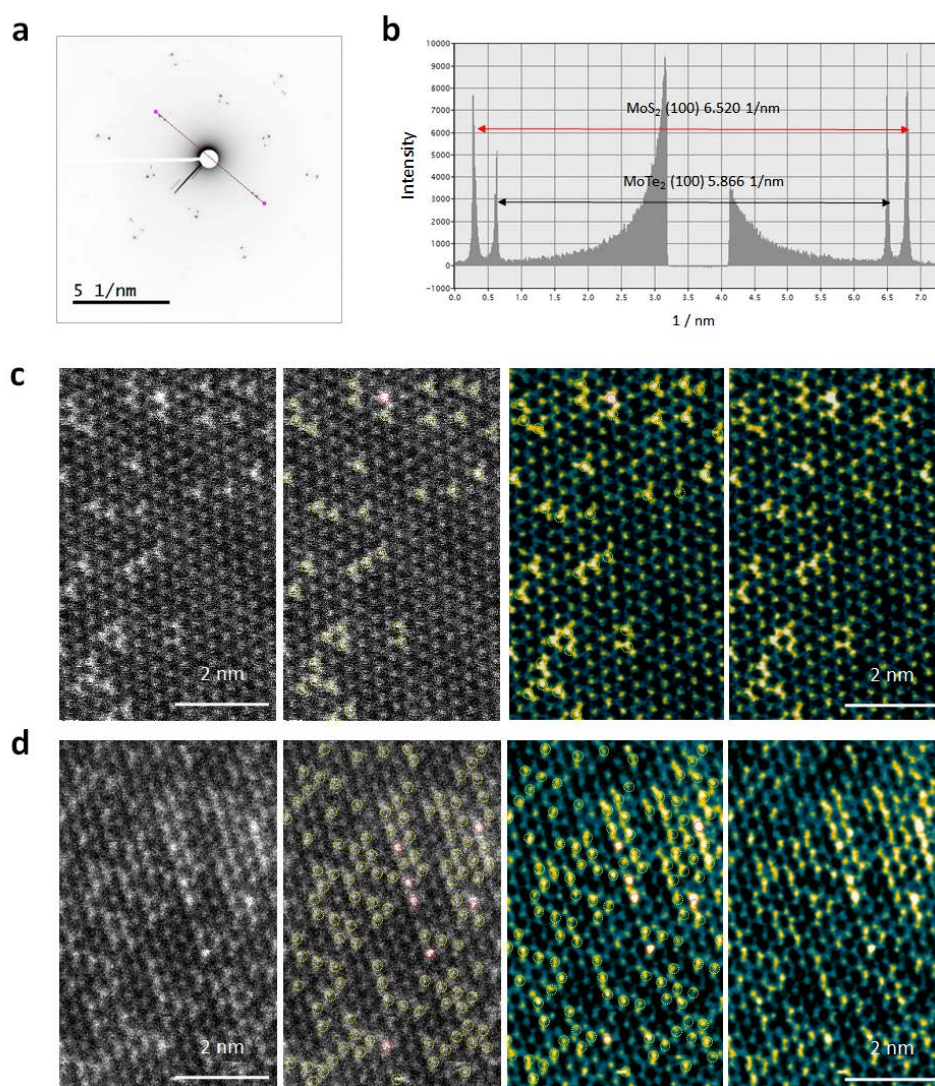

**Supplementary Figure 7 | TEM analysis of  $\text{MoS}_x\text{Te}_{2-x}$  alloy.** **a**, Electron diffraction pattern of the  $\text{MoS}_x\text{Te}_{2-x}$  alloy. Another six dots inside the diffraction patterns of 2H- $\text{MoS}_2$  were seen with the same orientation. **b**, Extracted lattice distances from the hexagonal diffraction patterns indicate that the inner and outer distances are 0.34 nm and 0.306 nm which are equivalent to  $\text{MoTe}_2$  and  $\text{MoS}_2$  phases, respectively. **c,d**, Raw and false-colored FFT filtered ADF-STEM images of region 1 and region 3 in Figure 3a. The two images on the left are the raw ADF-STEM image and the chalcogen site marked image (Te-S in the yellow circle and Te-Te in the red circle). After false-colored FFT filtering, Te substitution sites are clearly distinguished.

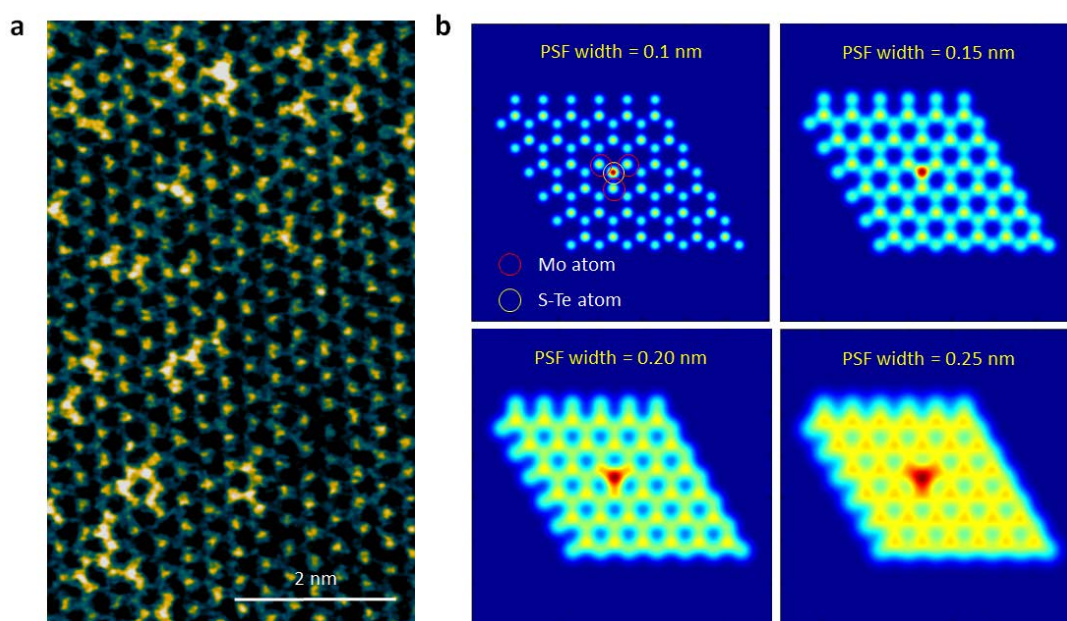

**Supplementary Figure 8 | Effect of point spread function width on STEM simulation. a**, FFT-filtered STEM image of  $\text{MoS}_{2-x}\text{Te}_x$  alloy where adjacent Mo atoms to Te atoms show higher intensity than adjacent Mo atoms to S atoms. **b**, Simulated STEM images of 1Te atom substituted monolayer  $\text{MoS}_{1.98}\text{Te}_{0.02}$  alloy with different point spread function (PSF) width. During FFT filtering, image can be modulated to increase the PSF width. To see the effect of PSF width on STEM image, we conducted STEM simulation depending on PSF width (0.1, 0.15, 0.2, 0.25 nm). It is clearly seen that the intensity of adjacent Mo atom to S-Te site is brighter in proportion to the PSF width.



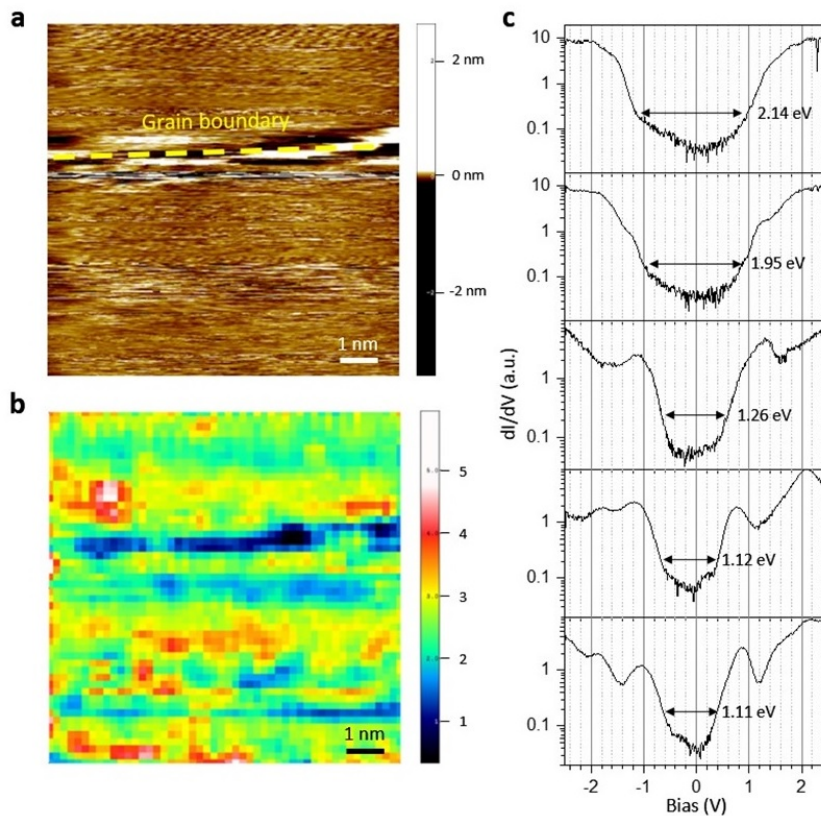

**Supplementary Figure 9 | Various band gaps of tellurized MoS<sub>2</sub> by STS measurement.** **a**, Surface morphology of tellurized MoS<sub>2</sub> on a HOPG substrate by scanning tunneling microscopy (STM) for STS mapping image. It shows a flat area with a grain boundary. The height fluctuation in the flat area has a range of  $\pm 0.1$  nm without any significant height changes, which rules out the structural change by vacancy defects or the adsorption of atoms/molecules involving a height change of 0.3–0.6 nm in the surface morphology (sample bias = 2 V, tunneling current = 1 nA). **b**, STS map image at 1.47 V. Even for the similar surface morphology in the flat area of (a), the STS result shows a fluctuation of the electronic structures in tellurized MoS<sub>2</sub> from region to region. In addition, the grain boundary exhibits distinguishable dI/dV characteristics. **c**, Log-scale STS line profile results from region to region. The bandgap fluctuates over each flat region. The observed largest bandgap (2.14 eV) is similar to that of pristine MoS<sub>2</sub> on a HOPG substrate in previous report<sup>1</sup> and smallest observed bandgap (1.1 eV) is similar to reported bandgap of 2H-MoTe<sub>2</sub><sup>2,3</sup>. The bandgap tuning window by the tellurization of MoS<sub>2</sub> from 2.14 eV to 1.1 eV is nearly twice that of MoS<sub>2-x</sub>Se<sub>x</sub> or Mo<sub>1-x</sub>W<sub>x</sub>S<sub>2</sub> alloys. For further information of bandgaps in MoS<sub>2-x</sub>Te<sub>x</sub> alloy, results from DFT calculations based on Janus structure are provided for comparison of the bandgap with non-Janus case (See Supplementary Figure 11). Note that these phases discuss here are distinguished with defects such as grain boundaries and point defects (See also Supplementary Figure 10).

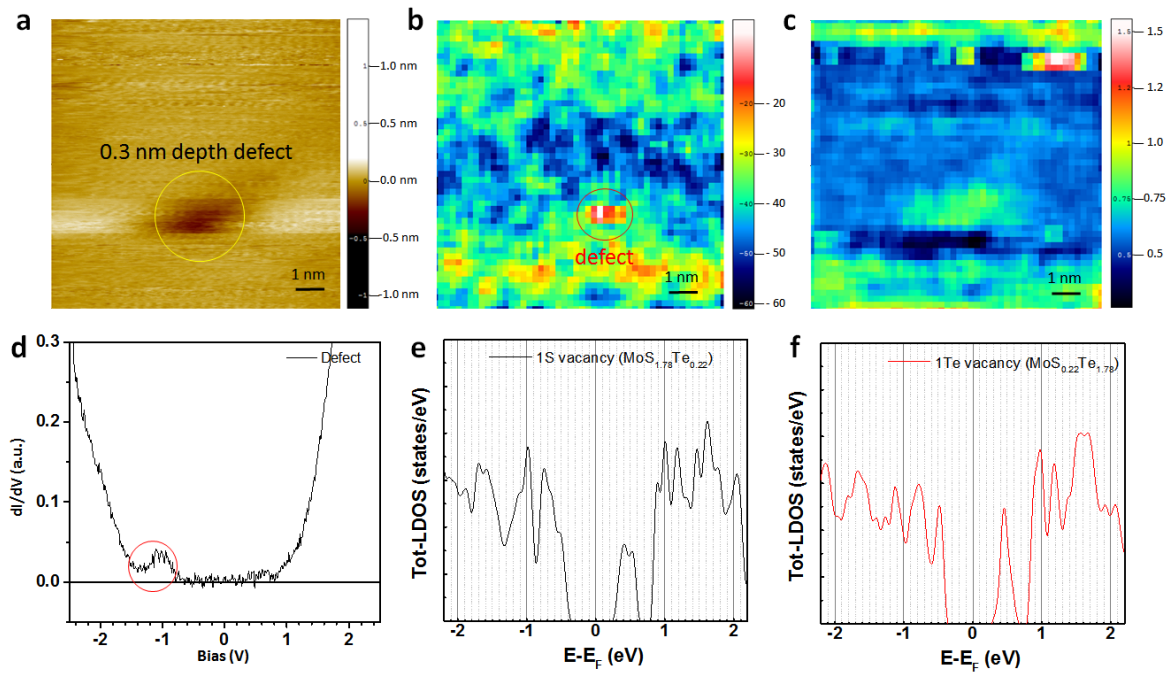

**Supplementary Figure 10 | Defect features of tellurized MoS<sub>2</sub>.** **a**, Surface morphology by STM shows a defect site. The defect site exhibits a height difference of ~0.3 nm, which indicates a structural change with a loss of atoms from the intrinsic MoS<sub>2</sub> structure. Substitutional changes between S and Te atoms within the same topology of MoS<sub>2</sub> did not exhibit such a height variation at the angstrom scale. The STS map images at -1 V (**b**) and 2.5 V (**c**). Both images show defect-induced states. **d**, STS line profile at the defect site shows the defect state at -1 V. **e,f**, Band structure of MoS<sub>0.22</sub>Te<sub>1.78</sub> with S and Te vacancies, respectively. Both S and Te vacancies generate a mid-gap band near the conduction band. In the STS results, the defect states were distinguished with surface morphological changes.

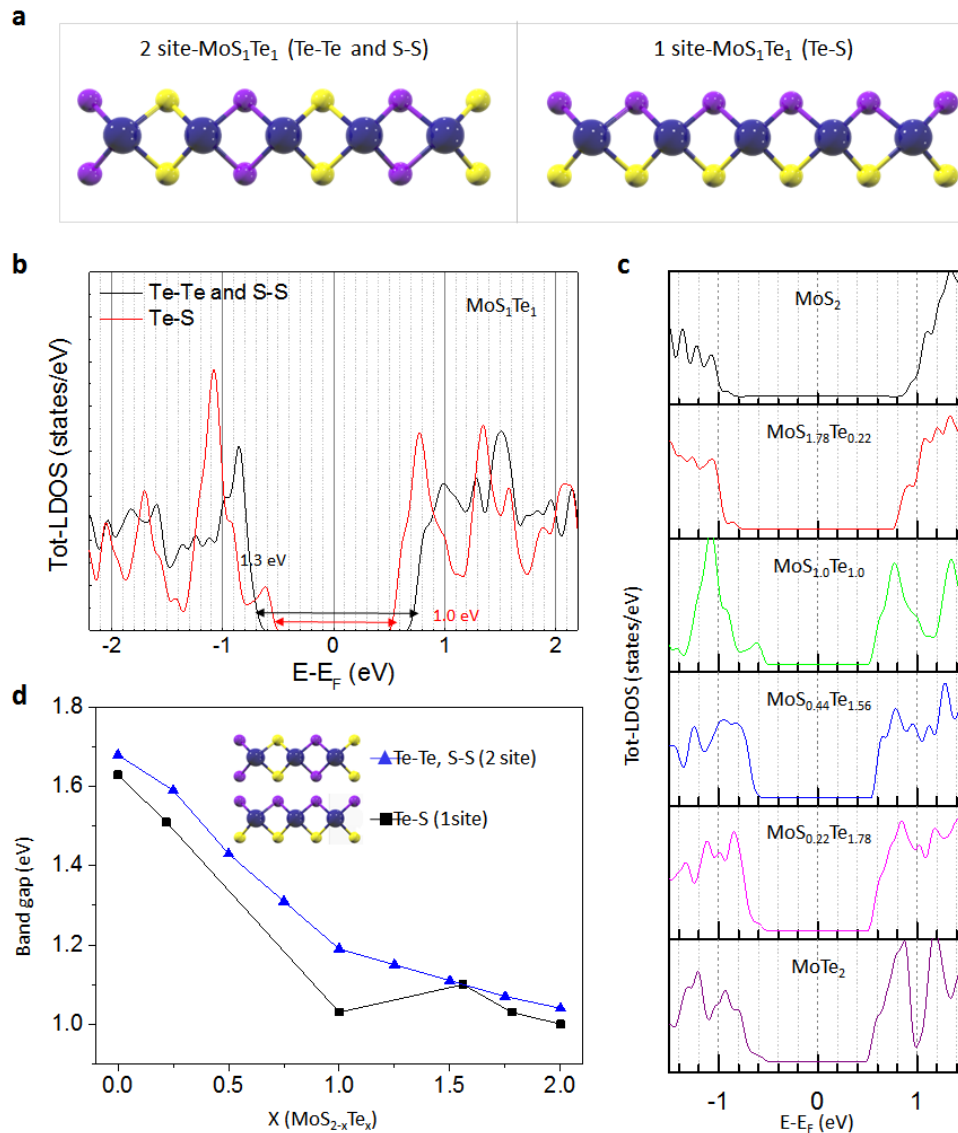

**Supplementary Figure 11 | The band structure of the Janus-phase  $\text{MoS}_x\text{Te}_{2-x}$  alloy by density functional theory.** **a**, Two types of atomic structure for the  $\text{MoS}_1\text{Te}_1$  alloy. The alloy structure where S and Te atoms are located in the same vertical line is defined as the '2' site (top), whereas the other case is defined as the '1' site or Janus phase (bottom). **b**, The comparison of band structures between the 2 site and 1 site (Janus phase). It should be noted that the Janus phase (1.0 eV) has a smaller bandgap than the 2-site structure does (1.3 eV). **c**, The evolution of the band structure of the 1-site  $\text{MoS}_x\text{Te}_{2-x}$  alloy with different relative concentrations between the S and Te atoms. The gap decreases with increasing Te concentration. No bowing effect is revealed. **d**, Bandgap of the  $\text{MoS}_x\text{Te}_{2-x}$  alloy depending on the Te content. The blue triangular and black square regions are values from DFT calculations for 2-site (composed of Te–Te and S–S)<sup>4</sup> and 1-site (Te–S) phases. The bandgap is reduced in 1-site  $\text{MoS}_1\text{Te}_1$  compared to that of the 2-site. Both cases show no bowing effect.

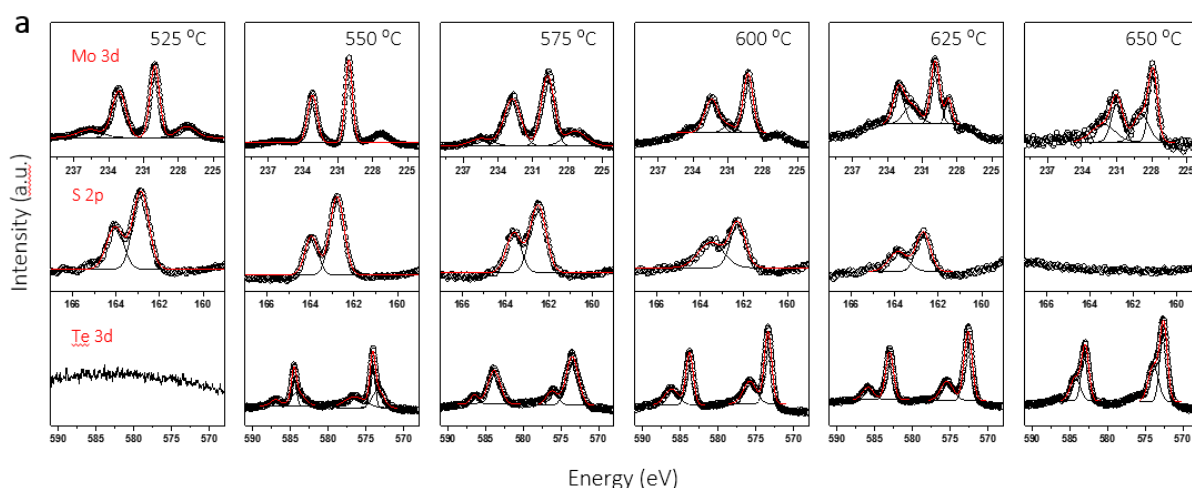

| Tellurization Temp.<br>(°C) | Mo 3d (eV) |        | S 2p (eV) |        | Te 3d (eV) |        | x<br>(MoS <sub>2-x</sub> Te <sub>x</sub> ) |
|-----------------------------|------------|--------|-----------|--------|------------|--------|--------------------------------------------|
|                             | 3/2        | 5/2    | 1/2       | 3/2    | 3/2        | 5/2    |                                            |
| 525                         | 233.11     | 230.03 | 162.85    | 164.04 | -          | -      | 0                                          |
| 550                         | 233.20     | 230.06 | 162.77    | 163.94 | 584.53     | 574.15 | 0.33                                       |
| 575                         | 232.76     | 229.72 | 163.61    | 162.49 | 583.87     | 573.51 | 0.54                                       |
| 600                         | 232.40     | 229.25 | 163.49    | 162.27 | 583.78     | 573.43 | 0.87                                       |
| 625                         | 231.90     | 228.73 | 163.83    | 162.68 | 583.05     | 572.67 | 1.03                                       |
| 650                         | 231.00     | 227.88 | -         | -      | 582.95     | 572.55 | 2                                          |

**Supplementary Figure 12 | XPS measurement for tellurized MoS<sub>2</sub> samples depending on the conversion temperature.** **a**, Deconvoluted XPS spectra for Mo 3d, S 2p, and Te 3d of tellurized MoS<sub>2</sub> converted at different temperatures. From 600 °C, other peaks in Mo 3d were emergent. They are correlated with the Mo 3d value of 1T' and the 2H-phase MoTe<sub>2</sub> which are correlated with Raman analysis. **b**, The table for XPS peak positions (Mo 3d, S 2p, and Te 3d) and S-to-Te ratio of tellurized MoS<sub>2</sub>. The Te content is proportional to the conversion temperature.

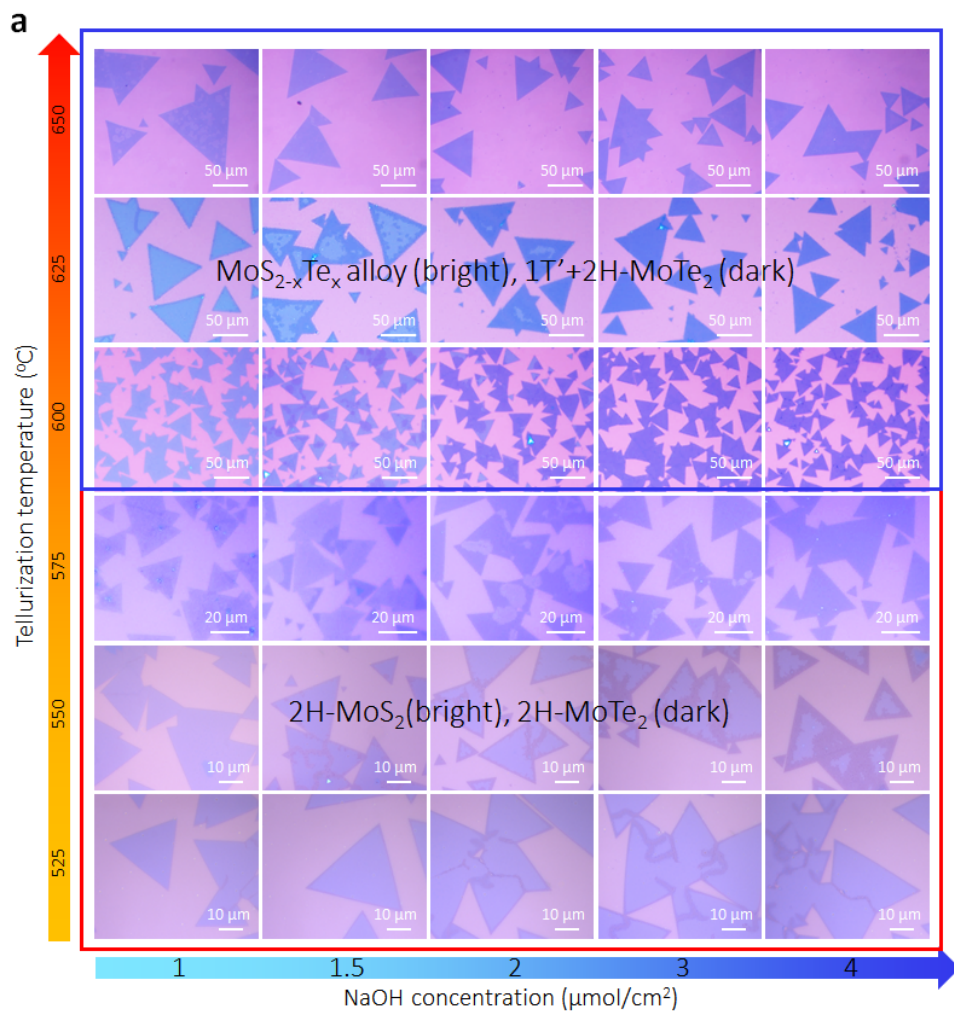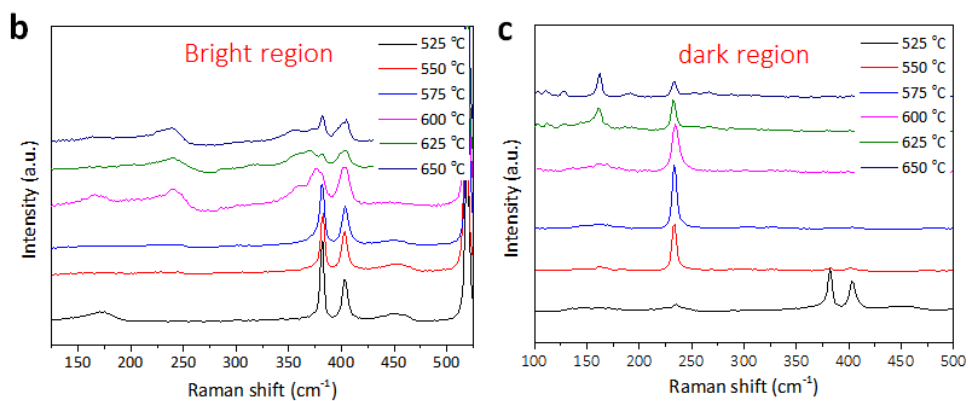

**Supplementary Figure 13 | Temperature and NaOH concentration dependence on tellurization of MoS<sub>2</sub>.** **a**,

The optical images of tellurized MoS<sub>2</sub> flakes depend on tellurization temperature and NaOH concentration.

There are two distinct regions in terms of optical contrast (the edge and grain boundaries of flakes are dark and inner region of flakes are bright). **b-c**, Raman spectra of bright region (**b**) and dark region (**c**) for tellurized MoS<sub>2</sub>

samples at various tellurization conditions. In temperature range from 525 °C to 575 °C, only MoS<sub>2</sub> peaks are

observed at bright regions because of the edge selective tellurization behavior. Over 600 °C, the basal surfaces of MoS<sub>2</sub> flakes are partially tellurized and converted to MoS<sub>2-x</sub>Te<sub>x</sub> alloy. The dark regions in all tellurized samples show Raman spectra of fully converted MoTe<sub>2</sub>. Only 2H-MoTe<sub>2</sub> phase are observed below 600 °C whereas mixed 1T' and 2H MoTe<sub>2</sub> phases are obtained over 600 °C. The small trace of MoS<sub>2</sub> peak in dark region in the bottom Raman spectrum (black color) is an artefact that due to too narrow area of 2H-MoTe<sub>2</sub> region, the laser spot size covered even MoS<sub>2</sub> region.

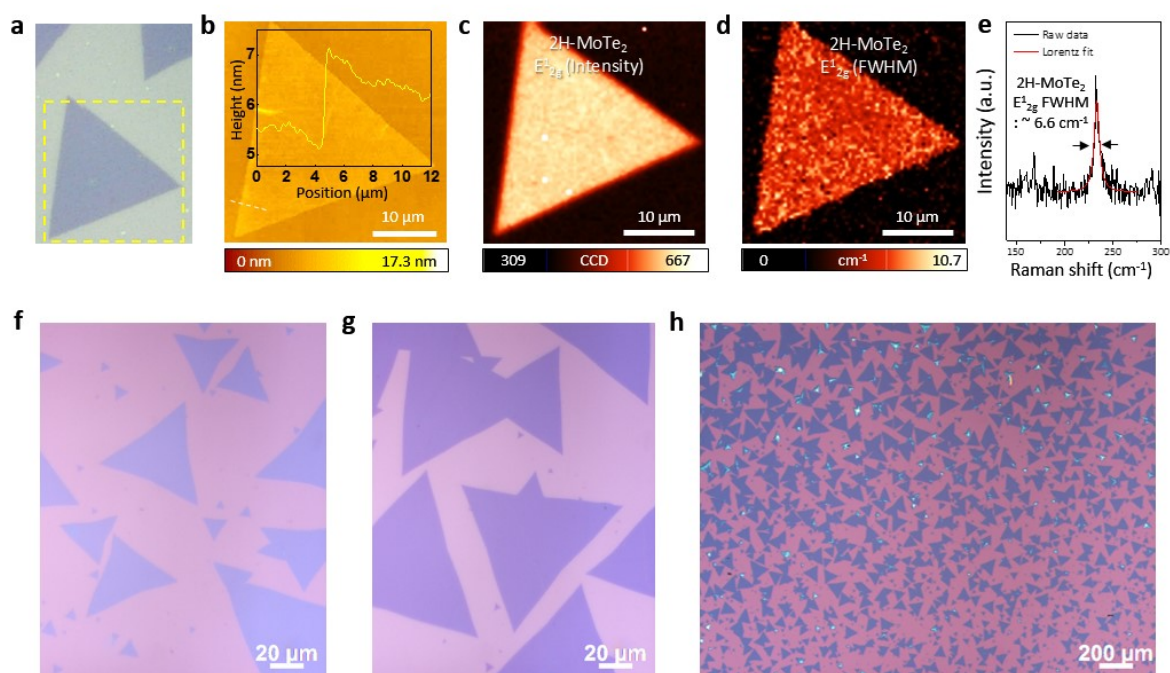

**Supplementary Figure 14 | The uniformity and crystallinity of fully converted 2H-MoTe<sub>2</sub>.** a–e, Optical micrograph (a), AFM image (b), confocal Raman mapping images for the intensity of E<sup>1</sup><sub>2g</sub> mode (c) and the FWHM of E<sup>1</sup><sub>2g</sub> mode (d) of fully converted 2H-MoTe<sub>2</sub> and its representative Raman spectrum (e). The uniform optical contrast in (a) and AFM image (b) show no significant structural deformation in the μm range. Raman mapping images for the intensity (c) and FWHM (d) of E<sup>1</sup><sub>2g</sub> mode for 2H-MoTe<sub>2</sub> indicate fully converted monolayer 2H-MoTe<sub>2</sub> flake with uniform crystallinity. The FWHM value for E<sup>1</sup><sub>2g</sub> mode is around 6.6 cm<sup>-1</sup> indicates that converted MoTe<sub>2</sub> has reasonable crystallinity compared to exfoliated one.

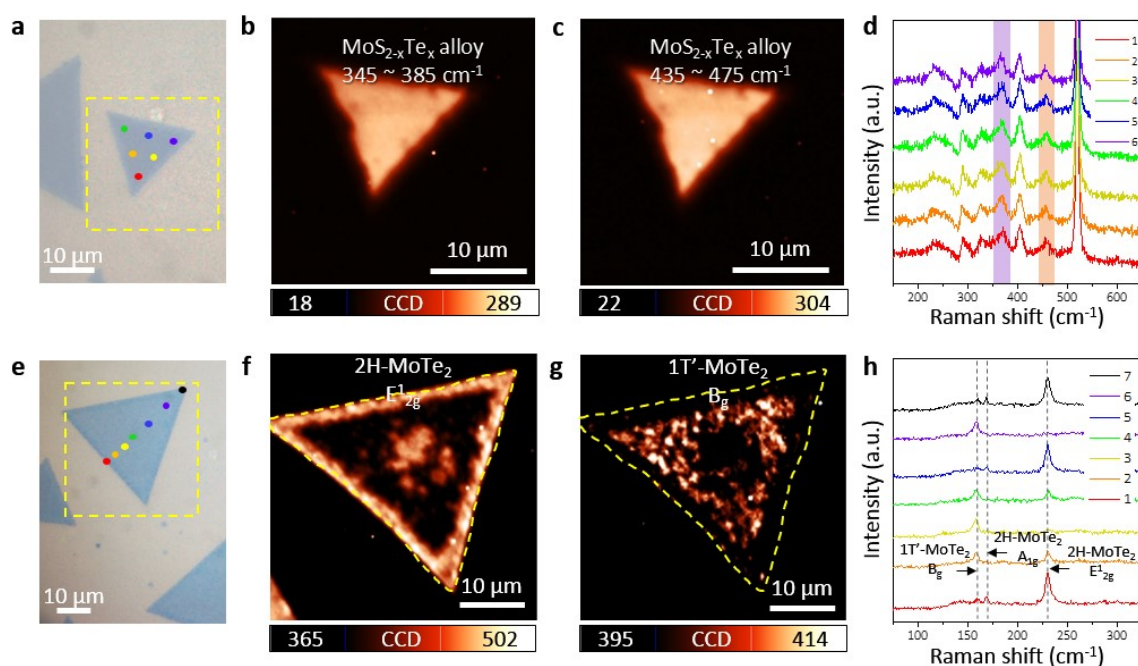

**Supplementary Figure 15 | The sample uniformity of  $\text{MoS}_{2-x}\text{Te}_x$  alloy and mixed  $1\text{T}'\text{-}2\text{H}$   $\text{MoTe}_2$ .** **a-d**, optical micrograph (a) and Raman mapping images for  $\text{MoS}_{2-x}\text{Te}_x$  alloy peaks (b and c) and its representative Raman spectra (d) marked in (a). The uniform contrast in Raman mapping images (b and c) indicate reasonable uniformity of  $\text{MoS}_{2-x}\text{Te}_x$  alloy in a micrometer scale (sample grown with  $625^\circ\text{C}$  and  $1\ \mu\text{mol cm}^{-2}$  for 30 min). **e-h**, optical micrograph (e), Raman mapping images for  $\text{E}^1_{2g}$  mode of  $2\text{H-MoTe}_2$  (f) and  $\text{B}_g$  mode of  $1\text{T}'\text{-MoTe}_2$  (g) and its representative Raman spectra (h) marked in (e). Each phase seems to be segregated to each other and the regions of  $2\text{H-MoTe}_2$  are located at the edge and center of flake, while  $1\text{T}'\text{-MoTe}_2$  exists in the middle of the flake. At the current stage, we are not sure why that kind of phenomenon took place. Single phase of  $1\text{T}'\text{-MoTe}_2$  is seen in regions marked by yellow and purple circle in (e). This indicates that there is possibility for fully converted single phase of  $1\text{T}'\text{-MoTe}_2$  in the inner area (g).



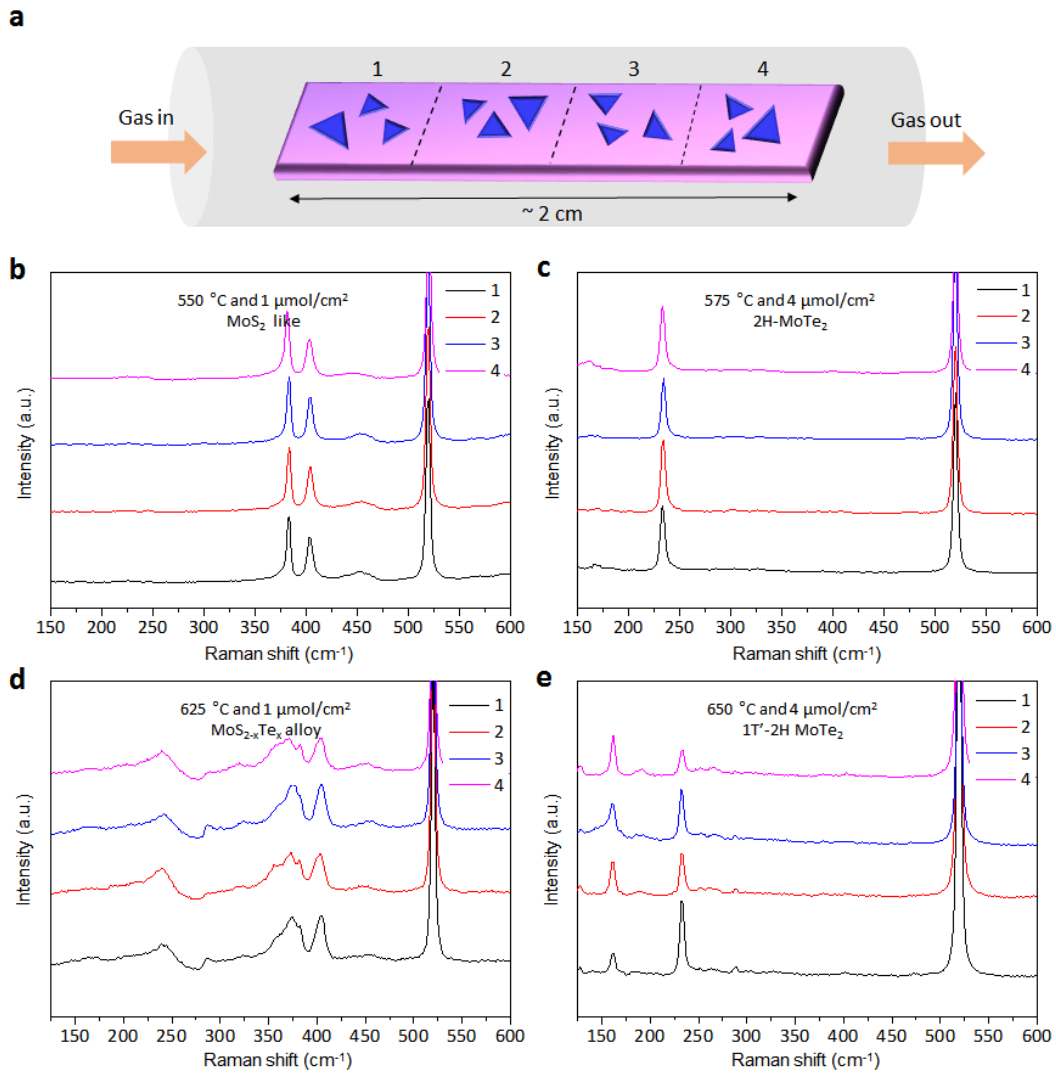

**Supplementary Figure 16 | Sample uniformity of tellurized MoS<sub>2</sub> sample at different positions.** To investigate uniformity with position, we measured Raman spectroscopy at four regions which are marked by the numbers in supplementary figure 16a for each sample. **b-d**, The position-dependent Raman spectra of tellurized MoS<sub>2</sub> at various telluriding conditions. We choose four representative conditions for MoS<sub>2</sub> like, 2H-MoTe<sub>2</sub>, MoS<sub>2-x</sub>Te<sub>x</sub> alloy and 1T'-2H MoTe<sub>2</sub>, respectively. All the samples show similar Raman spectra to each other except the 1T'-2H MoTe<sub>2</sub> case (**e**) where the relative composition of 1T' phase to 2H phase is slightly different from each other.

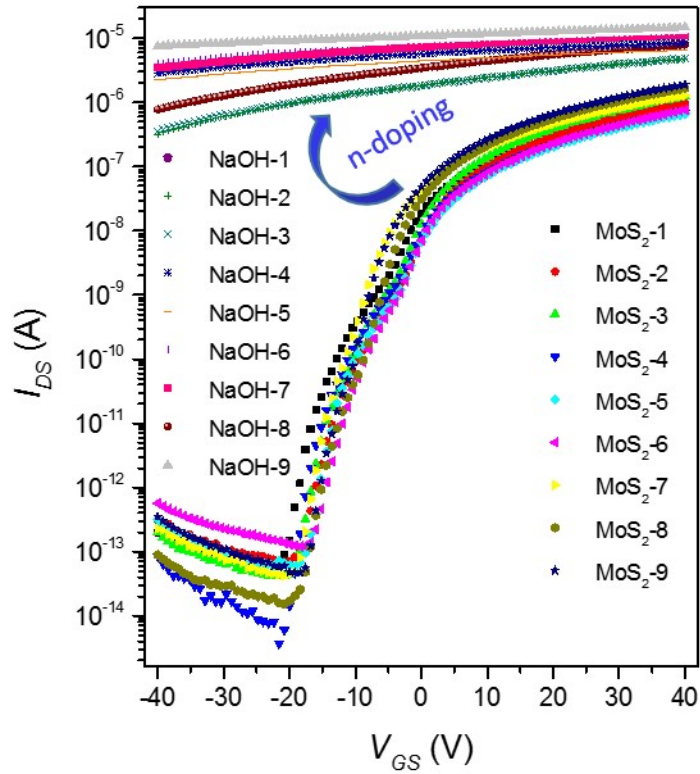

**Supplementary Figure 17 | The effect of Na contamination on electrical transport behavior of MoS<sub>2</sub> FET.**

To confirm the effect of Na contamination to electrical transport of MoS<sub>2</sub> sample, we fabricated the nine number of MoS<sub>2</sub>-FETs and measured electrical transport before and after NaOH doping. It is clear that Na-contamination gives n-type doping effect to MoS<sub>2</sub>. Furthermore, there is a good reference which shows n-type doping effect of Na to MoS<sub>2</sub><sup>5</sup>. In this regard, our p-type doping behavior of tellurized MoS<sub>2</sub> does not originates from Na contamination but from Te substitution. .

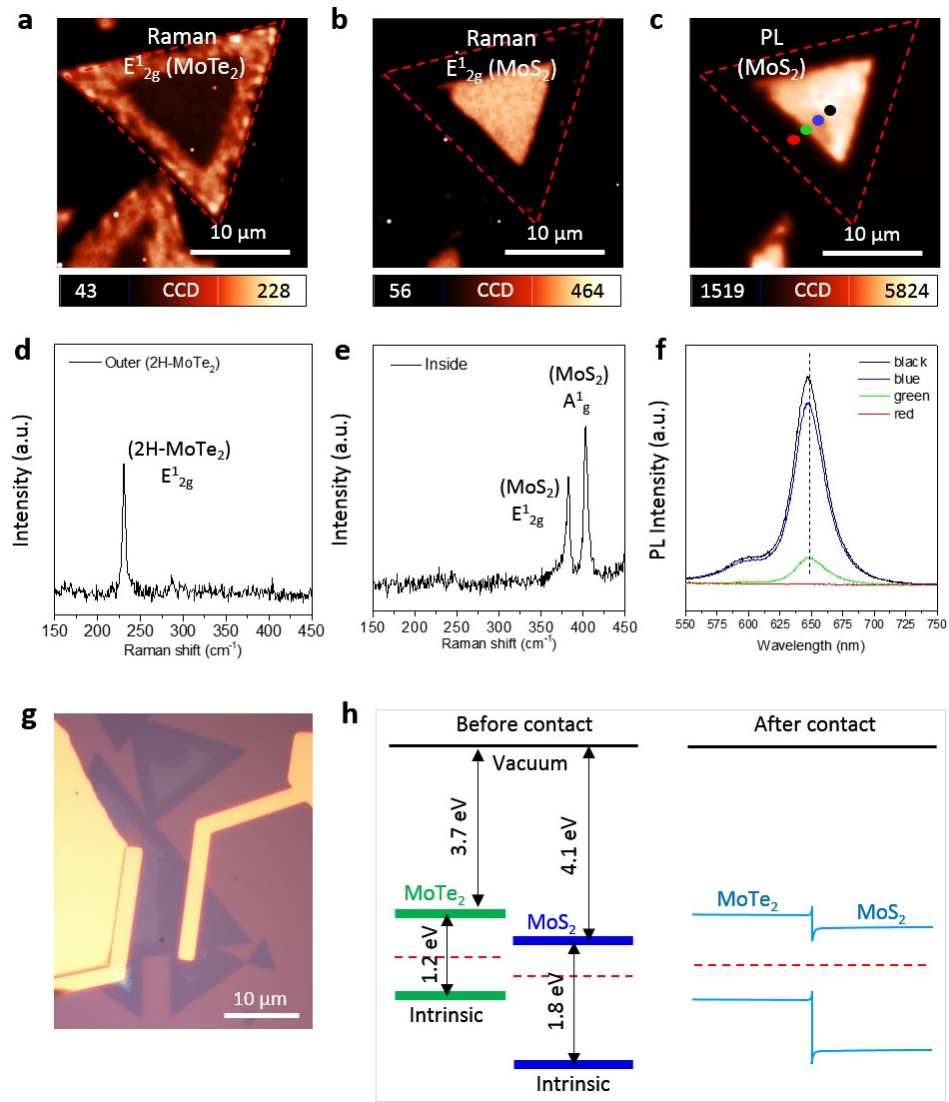

**Supplementary Figure 18 | Lateral heterojunction between 2H-MoS<sub>2</sub> and 2H-MoTe<sub>2</sub>.** Raman mapping images (a, b) for the E<sub>2g</sub><sup>1</sup> mode of 2H-MoS<sub>2</sub> (MoTe<sub>2</sub>) and each representative spectrum (d, e). **c,f**, PL mapping image for MoS<sub>2</sub>/MoTe<sub>2</sub> heterojunction and its representative PL spectra in marked regions in (c). PL is highly sensitive to doping. Inner part shows pristine MoS<sub>2</sub> PL spectrum. No distinguishable change in the peak position is observed across the junction, indicating that a sharp interface between MoS<sub>2</sub> and MoTe<sub>2</sub> is formed. **g,h**, Optical image of the MoS<sub>2</sub>/MoTe<sub>2</sub> junction device (g) and its band alignment.

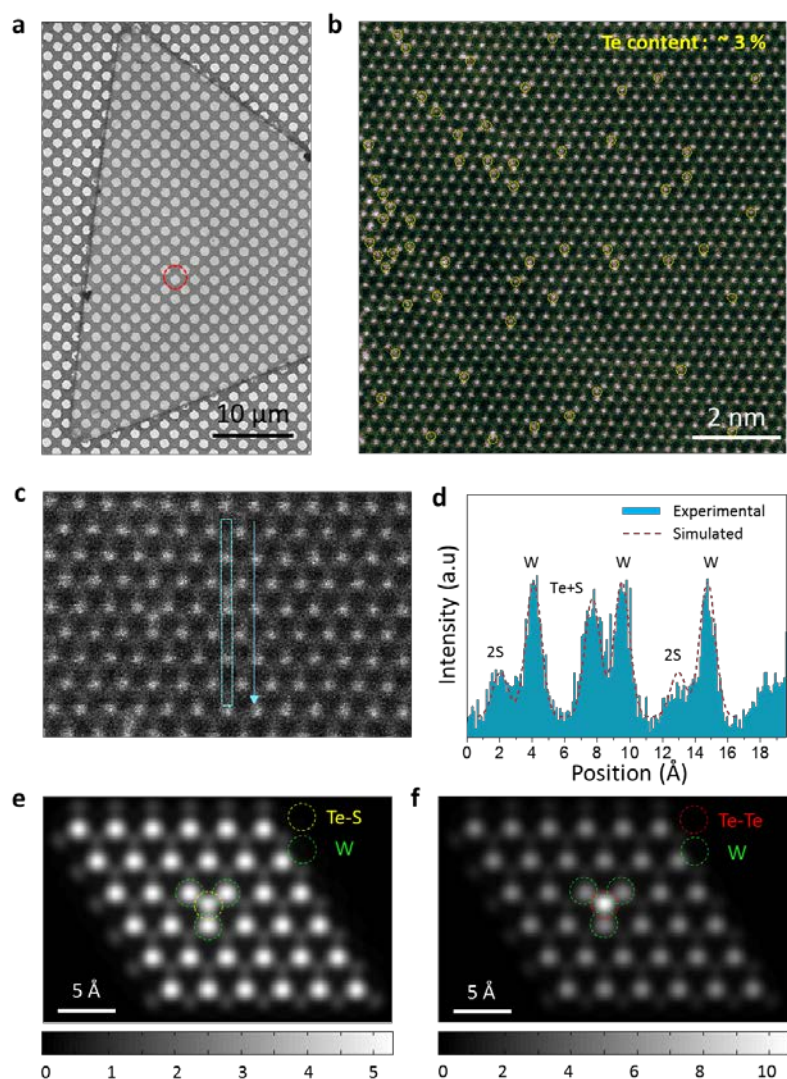

**Supplementary Figure 19 | TEM analysis for inner part of tellurized WS<sub>2</sub> Sample.** **a**, Low-magnification TEM image of the tellurized WS<sub>2</sub> flake on a 1.2- $\mu\text{m}$  hole Cu grid. **b**, The ADF-STEM image for inner region (marked by red circle in supplementary figure 19a) of tellurized WS<sub>2</sub>. Te content is approximately assumed to 3 percent by counting Te atoms. **c,d**, Representative ADF-STEM images of inner region and intensity profile in blue box in **c** respectively. Some bright spots were seen in chalcogen sites and it has lower intensity than W atom but higher than 2S atom indicating the existence of Te-S species. **e,f**, Simulated STEM image for Te-S site and Te-Te site in WS<sub>2-x</sub>Te<sub>x</sub> alloy. Te-Te site has higher intensity than W site while Te-S site has similar intensity compared to W site.

## Supplementary Tables

Supplementary Table 1 | Thermodynamic data table for tellurization of MoS<sub>2</sub>.

| Temperature<br>(K) | G H <sub>2</sub> (g)<br>(kJ/mol) <sup>6</sup> | G H <sub>2</sub> O(g)<br>(kJ/mol) <sup>6</sup> | G MoS <sub>2</sub> (s)<br>(kJ/mol) <sup>6</sup> | G MoTe <sub>2</sub> (s)<br>(kJ/mol) <sup>7</sup> | G Na <sub>2</sub> S(s)<br>(kJ/mol) <sup>6</sup> | G Na <sub>2</sub> Te(s)<br>(kJ/mol) <sup>6</sup> | G Na <sub>2</sub> O(s)<br>(kJ/mol) <sup>6</sup> | G NaOH(l)<br>(kJ/mol) <sup>6</sup> | G S <sub>2</sub> (g)<br>(kJ/mol) <sup>6</sup> | G Te <sub>2</sub> (g)<br>(kJ/mol) <sup>6</sup> |
|--------------------|-----------------------------------------------|------------------------------------------------|-------------------------------------------------|--------------------------------------------------|-------------------------------------------------|--------------------------------------------------|-------------------------------------------------|------------------------------------|-----------------------------------------------|------------------------------------------------|
| 600                | -81.836                                       | -359.23                                        | -321.694                                        | 62.46                                            | -433.742                                        | -392.087                                         | -471.851                                        | -472.652                           | -12.304                                       | 0.63                                           |
| 700                | -97.175                                       | -380.838                                       | -333.387                                        | 29.253                                           | -449.987                                        | -409.778                                         | -485.456                                        | -486.998                           | -34.817                                       | -28.185                                        |
| 800                | -112.937                                      | -402.982                                       | -346.155                                        | -4.903                                           | -467.503                                        | -428.657                                         | -500.326                                        | -502.569                           | -63.848                                       | -57.563                                        |
| 900                | -129.07                                       | -425.612                                       | -359.879                                        | -39.901                                          | -486.147                                        | -448.591                                         | -516.336                                        | -519.205                           | -90.336                                       | -87.44                                         |
| 1000               | -145.536                                      | -448.687                                       | -374.462                                        | -75.662                                          | -505.809                                        | -469.479                                         | -533.384                                        | -536.779                           | -117.232                                      | -117.769                                       |
| 1100               | -162.305                                      | -472.174                                       | -389.829                                        | -112.12                                          | -526.412                                        | -491.238                                         | -551.516                                        | -555.193                           | -144.496                                      | -148.51                                        |
| 1200               | -179.352                                      | -496.049                                       | -405.916                                        | -149.222                                         | -548.04                                         | -513.115                                         | -570.569                                        | -574.363                           | -172.096                                      | -179.633                                       |

**Supplementary Table 2 | Cohesive energy and decomposition temperature of transition metal dichalcogenides.**

| <b>Material</b>         | <b>Cohesive energy (M–X) (eV)</b> | <b>Decomposition temp. (°C)</b> |
|-------------------------|-----------------------------------|---------------------------------|
| <b>MoS<sub>2</sub></b>  | 15.31 <sup>8</sup>                | ~1090 <sup>9</sup>              |
| <b>MoSe<sub>2</sub></b> | 13.70 <sup>8</sup>                | ~980 <sup>9</sup>               |
| <b>MoTe<sub>2</sub></b> | 12.01 <sup>8</sup>                | ~700 <sup>9</sup>               |
| <b>WS<sub>2</sub></b>   | 17.28 <sup>8</sup>                | ~1040 <sup>9</sup>              |
| <b>WSe<sub>2</sub></b>  | 15.45 <sup>8</sup>                | ~ 930 <sup>9</sup>              |
| <b>WTe<sub>2</sub></b>  | 13.51 <sup>8</sup>                | ~ 700 <sup>9</sup>              |

## Supplementary Note

### Supplementary Note 1 | Na-scooter (Na<sub>2</sub>Te) formation from NaOH.

Sodium metal reacts with tellurium during the tellurization process and forms a Na-scooter (Na<sub>2</sub>Te). The NaOH can be thermally reduced to Na<sub>2</sub>O by desorbing H<sub>2</sub>O gas during a dry process. Therefore, we assume that the starting material could be NaOH or Na<sub>2</sub>O. The expected reactions for forming Na<sub>2</sub>Te in the presence of tellurium and hydrogen gas are written below.

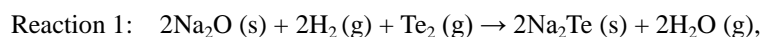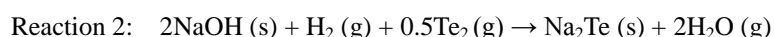

To anticipate its favorability of reaction, we calculated the Gibbs free energy for the mentioned reactions in the temperature range of 323 °C to 923 °C (Supplementary Figure 2a). Both reactions show negative values, indicating that Na<sub>2</sub>Te formation is thermodynamically favorable from a NaOH precursor. Reaction 2 is regarded as more active than reaction 1 in terms of the Gibbs free energy.

To confirm Na<sub>2</sub>Te formation, we conducted energy dispersive spectrometry (EDS) measurements for the NaOH-coated substrate after tellurization (Supplementary Figure 2b). The dark gray color and the presence of Na and Te peaks in the EDS measurements indicate that sodium telluride is formed. The atomic ratio of Na to Te is around 1.9, implying the likely formed Na<sub>2</sub>Te complex. The detected O peak in the EDS measurement results from oxidized Na<sub>2</sub>Te because it is very sensitive to air during sample transfer for measurement. X-ray diffraction (XRD) was used for further confirming the formation of Na<sub>2</sub>Te (Supplementary Figure 2c). We used the sealed sample holder to avoid oxidation of tellurized NaOH sample. The XRD peaks from tellurized NaOH (experimental) are well matched with Na<sub>2</sub>Te with very small feature of NaTe and NaTe<sub>3</sub>, indicating that NaOH are mostly converted to Na<sub>2</sub>Te during tellurization process.

## Supplementary References

1. Shin, B.G. *et al.* Indirect bandgap puddles in monolayer MoS<sub>2</sub> by substrate-induced local strain. *Adv. Mater.* **28**, 9378-9384 (2016).
2. Lezama, I.G. *et al.* Surface transport and band gap structure of exfoliated 2H-MoTe<sub>2</sub> crystals. *2D Mater.* **1**, 021002 (2014).
3. Yu, Y. *et al.* Molecular beam epitaxy growth of atomically ultrathin MoTe<sub>2</sub> lateral heterophase homojunctions on graphene substrates. *Carbon* **115**, 526-531 (2017).
4. Rajbanshi, B., Sarkar, S. & Sarkar, P. The electronic and optical properties of MoS<sub>2</sub>(1-x)Se<sub>2x</sub> and MoS<sub>2</sub>(1-x)Te<sub>2x</sub> monolayers. *Phys. Chem. Chem. Phys.* **17**, 26166-26174 (2015).
5. Komesu, T. *et al.* A. Occupied and unoccupied electronic structure of Na doped MoS<sub>2</sub> (0001). *Appl. Phys. Lett.* **105**, 241602 (2014).
6. Barin, I. *Thermochemical Data of Pure Substances*. (Wiley-VCH, Wiley, 1997).
7. Mallika, C. & Sreedharan, O. Standard molar Gibbs energy of formation of MoTe<sub>2</sub> from emf measurements. *The Journal of Chemical Thermodynamics* **20**, 769-775 (1988).
8. Kang, J., Tongay, S., Zhou, J., Li, J. & Wu, J. Band offsets and heterostructures of two-dimensional semiconductors. *Appl. Phys. Lett.* **102**, 012111 (2013).
9. Brainard, W. A. *The thermal stability and friction of the disulfides, diselenides, and ditellurides of molybdenum and tungsten in vacuum*. (National Aeronautics and Space Administration, 1968).
